# Supplementary material for: Enabling the hypothesis-driven prioritization of ligand candidates in big databases: Screenlamp and its application to GPCR inhibitor discovery for invasive species control
Source: Springer Nature journal article supplement (doi:10.1007/s10822-018-0100-7), 2018-01-29
Supplement: 10822_2018_100_MOESM3_ESM.pdf [file 10822_2018_100_MOESM3_ESM.pdf]

### Supplementary Material for

"Enabling the hypothesis-driven prioritization of ligand candidates in big databases:  
Screenlamp and its application to GPCR inhibitor discovery for invasive species control"  
by Sebastian Raschka, Anne M. Scott, Nan Liu, Santosh Gunturu, Mar Huertas, Weiming Li, and  
Leslie A. Kuhn,  
*Journal of Computer-Aided Molecular Design*

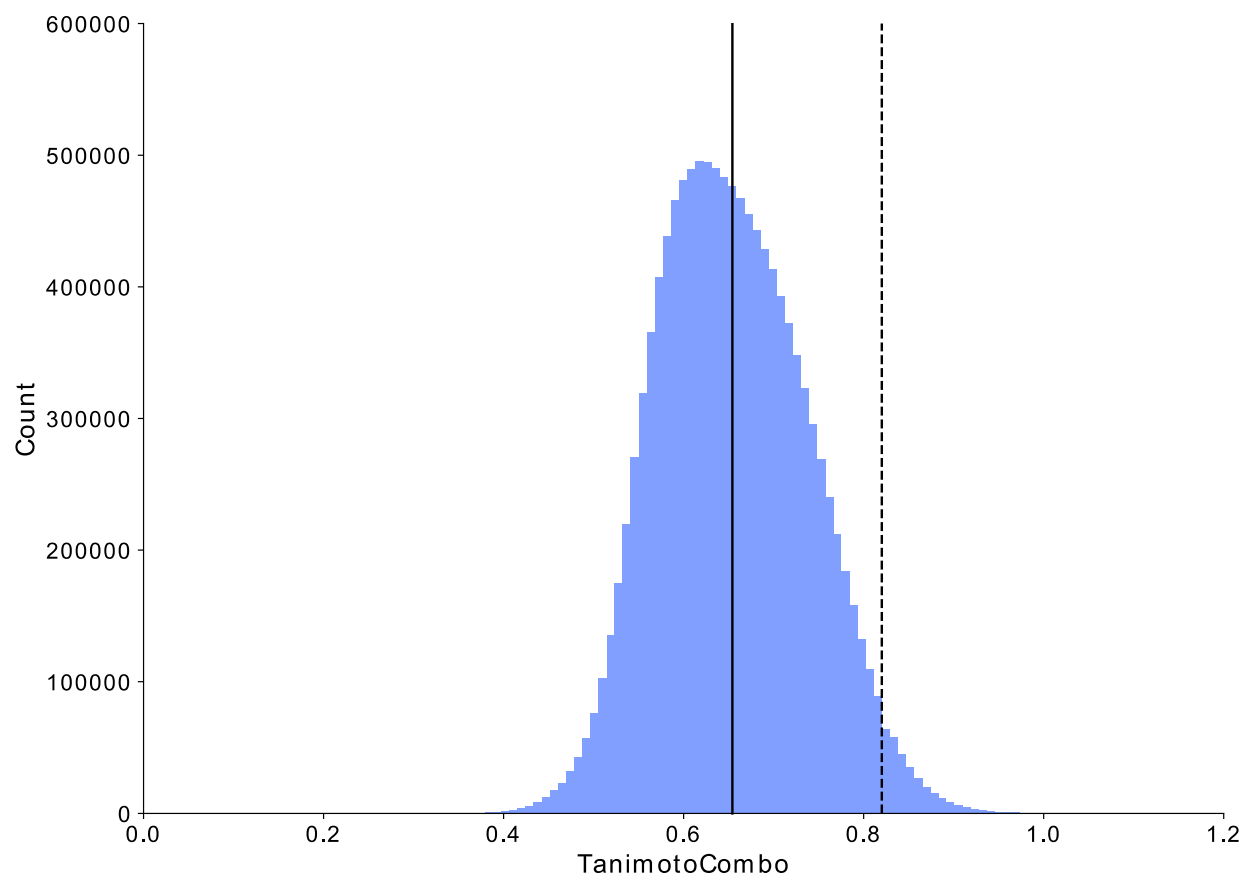

**Fig. S1** TanimotoCombo similarity score distribution from overlaying the low-energy conformers of 3kPZS with the single-conformer drug-like database from ZINC. The black vertical line indicates the mean of the distribution, and the dashed line indicates a similarity score threshold two standard deviations above the mean

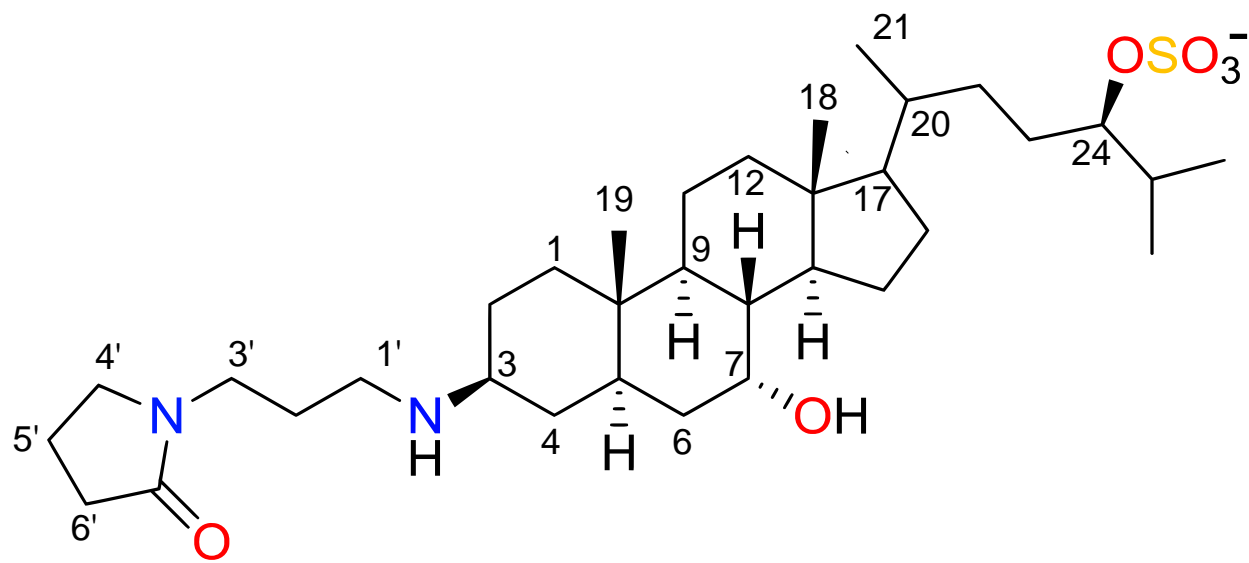

**Fig. S2** Structure of PAMS-24
