# Supplementary material for: Enabling the hypothesis-driven prioritization of ligand candidates in big databases: Screenlamp and its application to GPCR inhibitor discovery for invasive species control
Source: Springer Nature journal article supplement (doi:10.1007/s10822-018-0100-7), 2018-01-29
Supplement: 10822_2018_100_MOESM4_ESM.pdf [file 10822_2018_100_MOESM4_ESM.pdf]

# PDBsum entry k279

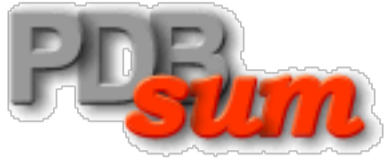Go to PDB code: 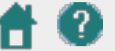[Top page](#) [Protein](#) [Clefts](#) [Pores](#)

No title

PDB id

**PROCHECK****Generate full PROCHECK analyses****PROCHECK summary for k279**

Ramachandran plot

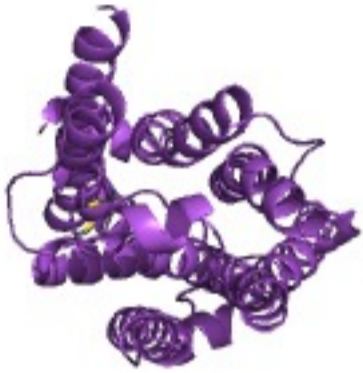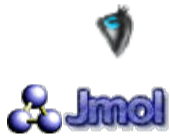**Contents**

- Protein chain
  - 274 a.a.

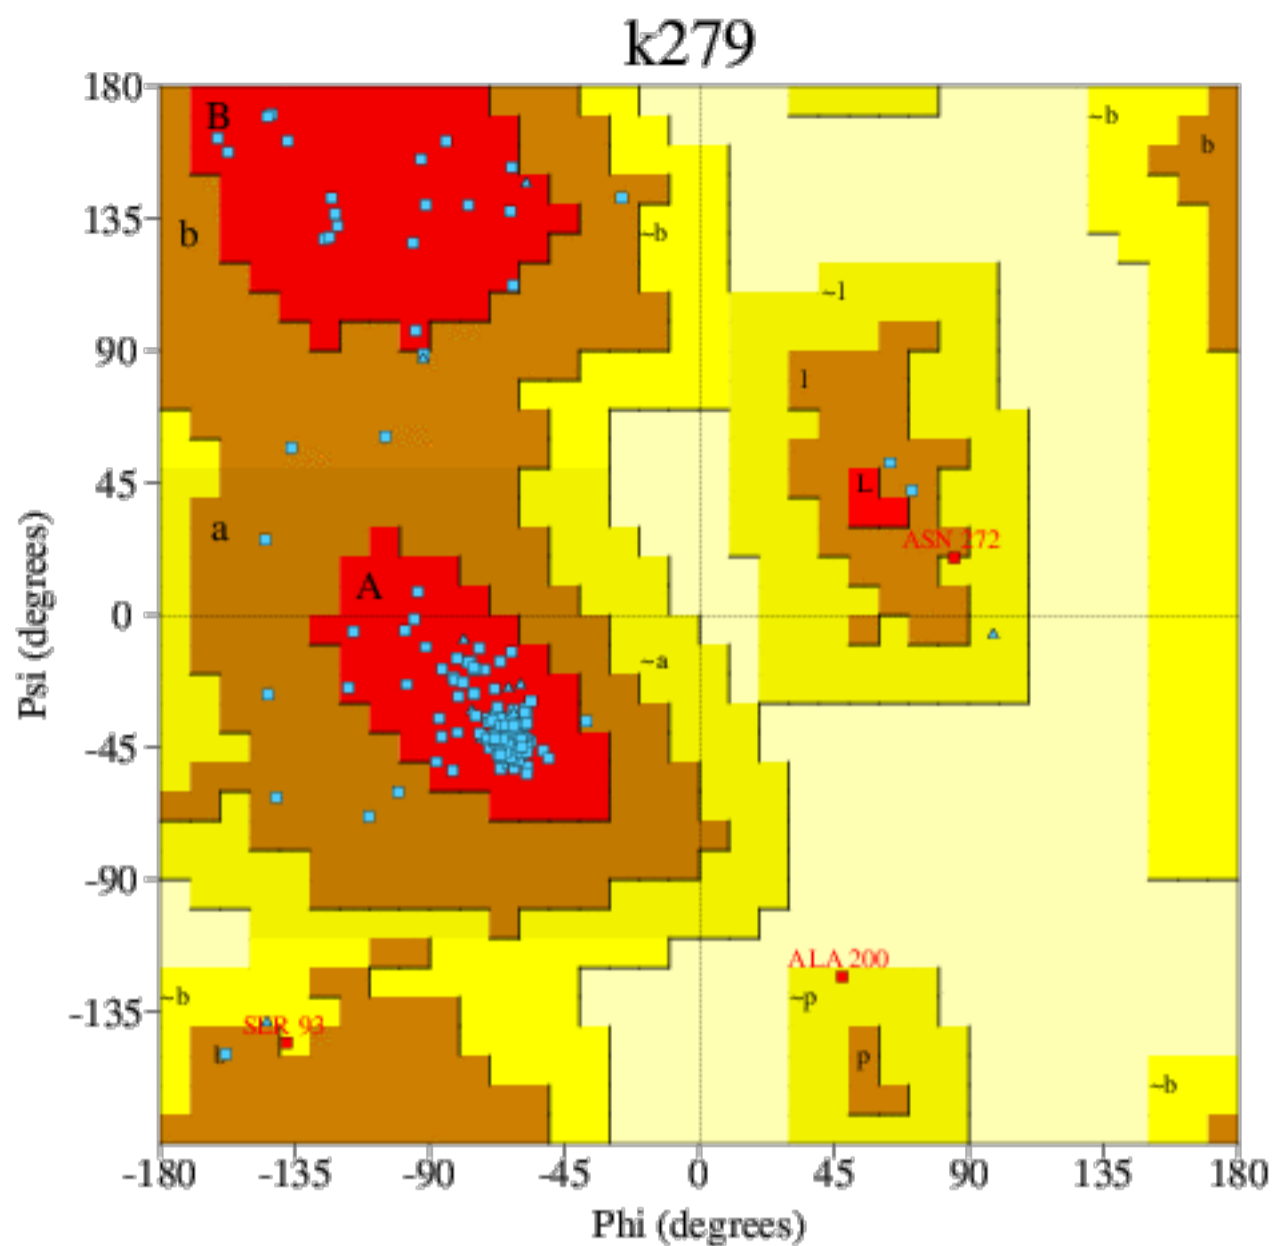

## PROCHECK statistics

---

### 1. Ramachandran Plot statistics

---

|                                          | No. of<br>residues | %-tage |
|------------------------------------------|--------------------|--------|
|                                          | -----              | -----  |
| Most favoured regions [A,B,L]            | 230                | 93.9%  |
| Additional allowed regions [a,b,l,p]     | 12                 | 4.9%   |
| Generously allowed regions [~a,~b,~l,~p] | 3                  | 1.2%   |
| Disallowed regions [XX]                  | 0                  | 0.0%   |
|                                          | ----               | -----  |
| Non-glycine and non-proline residues     | 245                | 100.0% |
| End-residues (excl. Gly and Pro)         | 5                  |        |
| Glycine residues                         | 11                 |        |
| Proline residues                         | 13                 |        |

Based on an analysis of **118** structures of resolution of at least **2.0** Angstroms and *R*-factor no greater than **20.0** a good quality model would be expected to have over **90%** in the most favoured regions [A,B,L].

## 2. G-Factors

| Parameter<br>-----           | Score<br>----- | Average<br>Score<br>----- |
|------------------------------|----------------|---------------------------|
| Dihedral angles:-            |                |                           |
| Phi-psi distribution         | 0.42           |                           |
| Chi1-chi2 distribution       | -0.42          |                           |
| Chi1 only                    | -0.23          |                           |
| Chi3 & chi4                  | 0.59           |                           |
| Omega                        | -0.78*         | -0.16<br>=====            |
| Main-chain covalent forces:- |                |                           |
| Main-chain bond lengths      | 0.21           |                           |
| Main-chain bond angles       | -0.34          | -0.11<br>=====            |
| OVERALL AVERAGE              |                | -0.12<br>=====            |

**G-factors** provide a measure of how **unusual**, or out-of-the-ordinary, a property is.

Values below -0.5\* - unusual

Values below **-1.0\*\*** - highly unusual

**Important note:** The main-chain bond-lengths and bond angles are compared with the Engh & Huber (1991) ideal values derived from small-molecule data. Therefore, structures refined using different restraints may show apparently large deviations from normality.

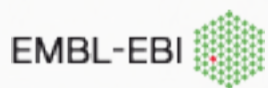

News  
Our impact  
Contact us  
Intranet

### Services

By topic  
By name (A-Z)  
Help & Support

### Research

Overview  
Publications  
Research groups  
Postdocs & PhDs

### Training

Overview  
Train at EBI  
Train outside EBI  
Train online  
Contact organisers

### Industry

Overview  
Members Area  
Workshops  
SME Forum  
Contact Industry  
programme

### About us

Overview  
Leadership  
Funding  
Background  
Collaboration  
Jobs  
People & groups  
News  
Events  
Visit us  
Contact us
